# Supplementary material for: Delivering metribuzin from biodegradable nanocarriers: assessing herbicidal effects for soybean plant protection and weed control
Source: Royal Society of Chemistry journal article supplement (doi:10.1039/d4en00784k), 2024-11-06
Supplement: d4en00784k1.pdf [file d4en00784k1.pdf]

## Delivering metribuzin from biodegradable nanocarriers: Assessing herbicidal effects for soybean plant protection and weed control

Vanessa Takeshita<sup>1</sup>; Felipe F. Oliveira<sup>2</sup>; Alvaro Garcia<sup>3</sup>; Nubia Zuverza-Mena<sup>4</sup>; Carlos Tamez<sup>4</sup>; Brian C. Cardoso<sup>1</sup>; Camila W. Pinácio<sup>1</sup>; Blaire Steven<sup>5</sup>; Jacquelyn LaReau<sup>5</sup>; Carlos E. Astete<sup>3</sup>; Cristina M. Sabliov<sup>3</sup>; Leonardo F. Fraceto<sup>6</sup>; Valdemar L. Tornisielo<sup>1</sup>; Christian O. Dimkpa<sup>4</sup>; Jason C. White<sup>4</sup>

<sup>1</sup>Center of Nuclear Energy in Agriculture, University of São Paulo, Piracicaba, SP 13416-000, Brazil; <sup>2</sup>Department of Plant Pathology & Nematology, Superior School of Agriculture “Luiz de Queiroz”, University of São Paulo, Piracicaba, SP 13418-900, Brazil; <sup>3</sup>Biological & Agricultural Engineering, Louisiana State University and LSU Ag Center, Baton Rouge, LA 70808, United States; <sup>4</sup>Department of Analytical Chemistry, The Connecticut Agricultural Experiment Station, New Haven, CT 06511, United States; <sup>5</sup>Department Environmental Science and Forestry, The Connecticut Agricultural Experiment Station, New Haven, CT 06504, United States; <sup>6</sup>Institute of Science and Technology, São Paulo State University (UNESP), Sorocaba, SP 18087-180, Brazil.

### Supplementary information

**Table S1.** Soil physicochemical properties.

| Parameters <sup>a</sup> | Sandy loam soil |
|-------------------------|-----------------|
| Sand (%)                | 50.4            |
| Silt (%)                | 31.6            |
| Clay (%)                | 18.0            |
| pH (CaCl <sub>2</sub> ) | 6.1             |
| Organic matter (%)      | 3.8             |

<sup>a</sup>Soil analyzed in Cornell Soil Health Lab, Ithaca, New York, United States of America.

**Table S2.** Nanoparticle characterization by dynamic light scattering (DLS). Hydrodynamic size, polydispersity index (PDI), and surface charge (zeta potential) of PCL-MTZ and PCL-lig-MTZ nanoparticles. The samples were diluted in ultrapure water (1:1000, v/v) and analyzed in ZetaSizer Nano ZS90 equipment (Malvern Instruments, United Kingdom).

| Nanoformulation | Nanoformulation characteristics* |             |                     |
|-----------------|----------------------------------|-------------|---------------------|
|                 | Hydrodynamic size (nm)           | PDI**       | Zeta potential (mV) |
| PCL-MTZ         | 265.83 ± 1.79                    | 0.17 ± 0.05 | -27.33 ± 0.03       |
| PCL-lig-MTZ     | 178.23 ± 0.26                    | 0.34 ± 0.03 | -42.27 ± 0.07       |

\*Measurements before preparation of work application solutions.

\*\*Dimensionless values.

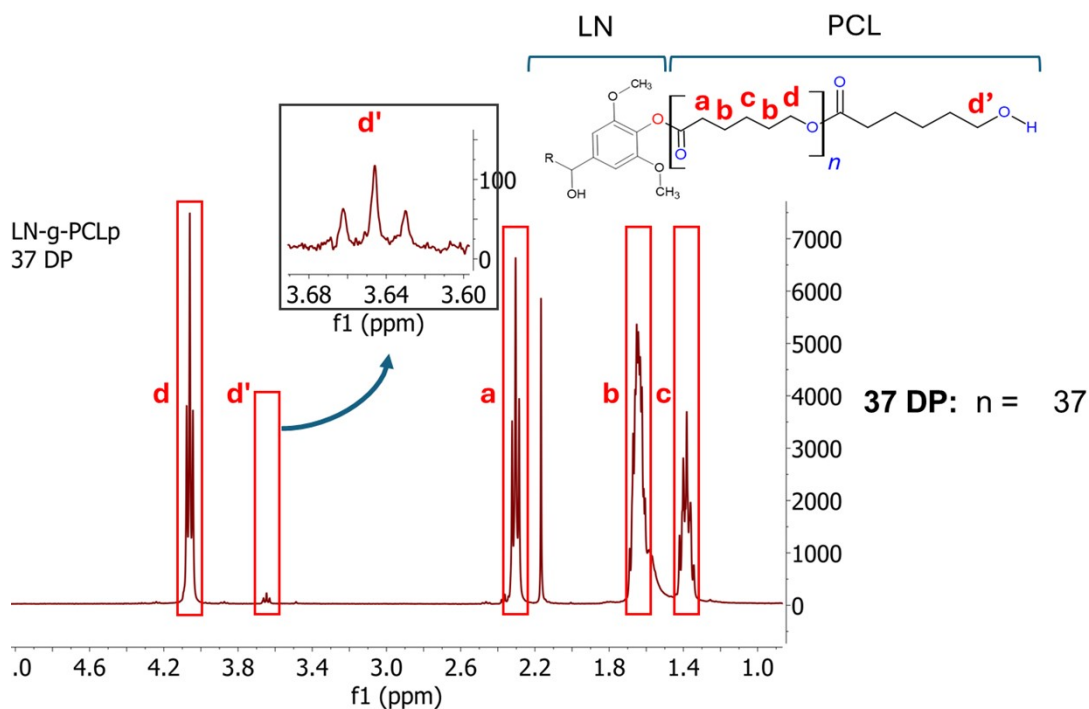

**Figure S1.**  $^1\text{H-NMR}$  for LN-g-PCL<sub>p</sub> 37 DP. Recorded on a Bruker 400 (Billerica, MA) at 400 Hz in deuterated chloroform ( $\text{CDCl}_3$ ).

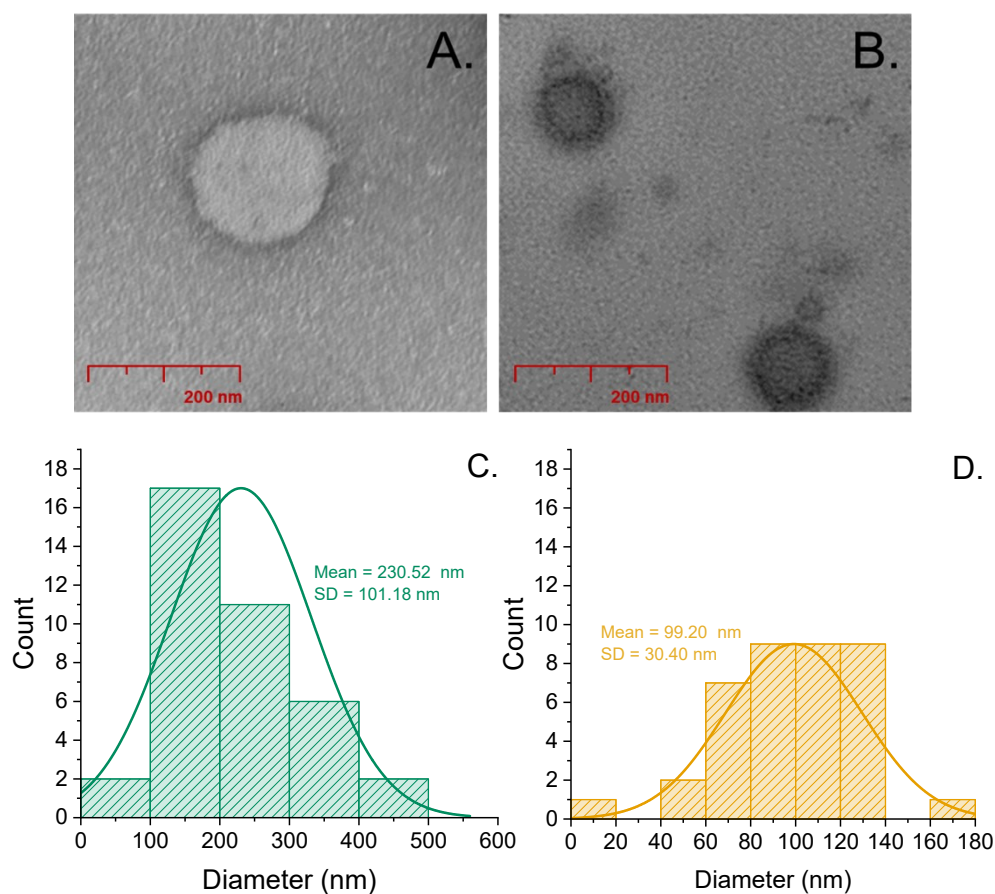

**Figure S2.** Morphology characterization of PCL-MTZ (a) and PCL-lig-MTZ (b) nanoparticles by Transmission Electron Microscopy (TEM). Diameter distribution of PCL-MTZ (c) and PCL-lig-MTZ (d) nanoparticles by TEM.

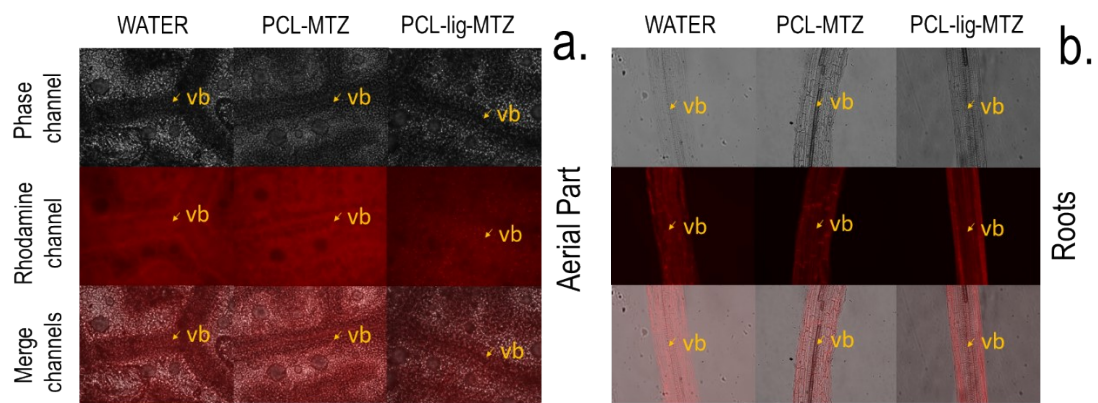

**Figure S3.** Fluorescence intensity of *Amaranthus retroflexus* plants at 5 days after application of metribuzin nanoformulations. Yellow arrows indicate the vascular bundles (vb) in the images of the aerial part and root (A).
